# Supplementary material for: ZIKV Inhibitors Based on Pyrazolo[3,4-d]pyridazine-7-one Core: Rational Design, In Vitro Evaluation, and Theoretical Studies
Source: PubMed Central journal article supplement — ACS Omega. 2023 Dec 14;8(51):48994–9008. doi: 10.1021/acsomega.3c06612 (PMC10753549; doi:10.1021/acsomega.3c06612), 2023-12-14

## **Supplementary Information**

### **ZIKV Inhibitors Based on Pyrazolo[3,4-*d*]pyridazine-7-one Core: Rational Design, *in vitro* Evaluation and Theoretical Studies**

Quang De Tran,<sup>a,b</sup> Cuong Quoc Nguyen,<sup>\*a,b</sup> Quang Le Dang,<sup>\*c,d</sup> Thi Hong Minh Nguyen,<sup>e</sup> Bui Thi Buu Hue,<sup>a</sup> Minh Uyen Thi Le,<sup>f</sup> Nguyen Trong Tuan,<sup>a</sup> Nguyen Quoc Chau Thanh,<sup>a</sup> Tran Thanh Men,<sup>g</sup> Pham Minh Quan,<sup>d,h</sup> Nguyen Duy Tuan,<sup>i</sup> Thai Thi Cam,<sup>i</sup> Nguyen Thi Thu Thuy,<sup>j</sup> Vu Thi Bich Hau,<sup>j</sup> Tran Duy Binh,<sup>g</sup> Hong Phuong Nguyen,<sup>\*k</sup>

- 
- a. Department of Chemistry, College of Natural Sciences, Can Tho University, Can Tho 94000, Vietnam.
  - b. Analytical Techniques Lab (1.16-ATL), CTU High-tech Building, Can Tho University, Can Tho 94000, Viet Nam.
  - c. Institute for Tropical Technology, Vietnam Academy of Science and Technology, Hanoi 10072, Vietnam.
  - d. Graduate University of Science and Technology, Vietnam Academy of Science and Technology, Hanoi 10072, Vietnam.
  - e. Department of Life Science, University of Science and Technology of Ha Noi, Vietnam Academy of Science and Technology, Ha Noi 10072, Vietnam.
  - f. Department of Surgery, Division of Transplant Surgery, Indiana University School of Medicine, Indianapolis, IN, USA.
  - g. Department of Biology, College of Natural Sciences, Can Tho University, Can Tho 94000, Vietnam.
  - h. Institute of Natural Products Chemistry, Vietnam Academy of Science and Technology, Ha Noi 10072, Vietnam.
  - i. Nam Can Tho University, Can Tho 94000, Vietnam.
  - j. National Institute of Hygiene and Epidemiology, No 1 Yersin, Hai Ba Trung, Ha Noi 10000, Vietnam.
  - k. Department of Pediatrics, Indiana University School of Medicine, Indianapolis, IN, USA.

#### **\*Correspondences:**

**Cuong Quoc Nguyen** - Email: ncquoc99@gmail.com

**Quang Le Dang** - Email: ledangquang2011@gmail.com / ldquang@itt.vast.vn

**Hong Phuong Nguyen** - Email: nguyeho@iu.edu and phuong.hn.jcb@gmail.com

## Contents

|                                                                                                                                                                                                                                                                                                                                                                                                                                                                              |     |
|------------------------------------------------------------------------------------------------------------------------------------------------------------------------------------------------------------------------------------------------------------------------------------------------------------------------------------------------------------------------------------------------------------------------------------------------------------------------------|-----|
| <b>Figure S1.</b> <sup>1</sup> H-NMR spectrum of <b>7a</b> .....                                                                                                                                                                                                                                                                                                                                                                                                             | S4  |
| <b>Figure S2.</b> HRMS spectrum of <b>7a</b> .....                                                                                                                                                                                                                                                                                                                                                                                                                           | S4  |
| <b>Figure S3.</b> <sup>1</sup> H-NMR spectrum of <b>7b</b> .....                                                                                                                                                                                                                                                                                                                                                                                                             | S5  |
| <b>Figure S4.</b> HRMS spectrum of <b>7b</b> .....                                                                                                                                                                                                                                                                                                                                                                                                                           | S5  |
| <b>Figure S5.</b> <sup>1</sup> H-NMR spectrum of <b>9a</b> .....                                                                                                                                                                                                                                                                                                                                                                                                             | S6  |
| <b>Figure S6.</b> <sup>1</sup> H-NMR spectrum of <b>9b</b> .....                                                                                                                                                                                                                                                                                                                                                                                                             | S6  |
| <b>Figure S7.</b> GC chromatogram of <b>9b</b> . GC-FID 2010 model (Shimadzu) in the following conditions: Programmed Temperature Vaporizer (PTV) in direct inject mode at 250°C using hydrogen as carrier gas and column flow in 2.04 mL/min at a constant pressure mode. The column oven temperature program started 150°C (hold 1 min), then programmed at 10°C/min to 320 °C (hold 4 min). The total analytical time was 30 min. The detector temperature was 320°C..... | S7  |
| <b>Figure S8.</b> HPLC chromatogram of <b>9b</b> under the following analytical condition: system: Agilent 1260 HPLC system; column: Agilent Eclipse ZORBAX XDB-C18 (46×250 mm; 5 μm); flowrate: 1.0 mL/min; column temperature: 40°C; UV wavelength: 272 nm; solvent system: 0-10 min: 100% MeOH. ....                                                                                                                                                                      | S7  |
| <b>Figure S9.</b> <sup>1</sup> H-NMR spectrum of <b>10a</b> .....                                                                                                                                                                                                                                                                                                                                                                                                            | S8  |
| <b>Figure S10.</b> <sup>1</sup> H-NMR spectrum of <b>10b</b> .....                                                                                                                                                                                                                                                                                                                                                                                                           | S9  |
| <b>Figure S11.</b> HPLC chromatogram of <b>10b</b> under the following analytical condition: system: Agilent 1260 HPLC system; column: Agilent Eclipse ZORBAX XDB-C18 (46×250 mm; 5 μm); flowrate: 1.0 mL/min; column temperature: 40°C; UV wavelength: 272 nm; solvent system: 0-10 min: 100% MeOH. ....                                                                                                                                                                    | S9  |
| <b>Figure S12.</b> <sup>1</sup> H-NMR spectrum of <b>11</b> .....                                                                                                                                                                                                                                                                                                                                                                                                            | S10 |
| <b>Figure S13.</b> HRMS spectrum of <b>11</b> .....                                                                                                                                                                                                                                                                                                                                                                                                                          | S10 |
| <b>Figure S14.</b> <sup>1</sup> H-NMR spectrum of <b>12</b> .....                                                                                                                                                                                                                                                                                                                                                                                                            | S11 |
| <b>Figure S15.</b> HRMS spectrum of <b>12</b> .....                                                                                                                                                                                                                                                                                                                                                                                                                          | S11 |
| <b>Figure S16.</b> <sup>1</sup> H-NMR spectrum of <b>13</b> .....                                                                                                                                                                                                                                                                                                                                                                                                            | S12 |
| <b>Figure S17.</b> HRMS spectrum of <b>13</b> .....                                                                                                                                                                                                                                                                                                                                                                                                                          | S12 |

|                                                                                                                                                                                                                                                                                                                                                                                                                                                                                                                                                                                                                                                                                                                                                                                                                                                                                                                  |     |
|------------------------------------------------------------------------------------------------------------------------------------------------------------------------------------------------------------------------------------------------------------------------------------------------------------------------------------------------------------------------------------------------------------------------------------------------------------------------------------------------------------------------------------------------------------------------------------------------------------------------------------------------------------------------------------------------------------------------------------------------------------------------------------------------------------------------------------------------------------------------------------------------------------------|-----|
| <b>Figure S18.</b> <sup>1</sup> H-NMR spectrum of <b>14</b> .....                                                                                                                                                                                                                                                                                                                                                                                                                                                                                                                                                                                                                                                                                                                                                                                                                                                | S13 |
| <b>Figure S19.</b> HRMS spectrum of <b>14</b> .....                                                                                                                                                                                                                                                                                                                                                                                                                                                                                                                                                                                                                                                                                                                                                                                                                                                              | S13 |
| <b>Figure S20.</b> <sup>1</sup> H-NMR spectrum of <b>17a</b> .....                                                                                                                                                                                                                                                                                                                                                                                                                                                                                                                                                                                                                                                                                                                                                                                                                                               | S14 |
| <b>Figure S21.</b> HPLC chromatogram of <b>17a</b> under the following analytical condition: system: Agilent 1260 HPLC system; column: Agilent Eclipse ZORBAX XDB-C18 (46×250 mm; 5 μm); flowrate: 1.0 mL/min; column temperature: 40°C; UV wavelength: 272 nm; solvent system: 0-10 min: 100% MeOH. ....                                                                                                                                                                                                                                                                                                                                                                                                                                                                                                                                                                                                        | S14 |
| <b>Figure S22.</b> <sup>1</sup> H-NMR spectrum of <b>17b</b> .....                                                                                                                                                                                                                                                                                                                                                                                                                                                                                                                                                                                                                                                                                                                                                                                                                                               | S15 |
| <b>Figure S23.</b> <sup>1</sup> H-NMR spectrum of <b>18a</b> .....                                                                                                                                                                                                                                                                                                                                                                                                                                                                                                                                                                                                                                                                                                                                                                                                                                               | S16 |
| <b>Figure S24.</b> <sup>1</sup> H-NMR spectrum of <b>18b</b> .....                                                                                                                                                                                                                                                                                                                                                                                                                                                                                                                                                                                                                                                                                                                                                                                                                                               | S17 |
| <b>Figure S25.</b> <sup>1</sup> H-NMR spectrum of <b>19a</b> .....                                                                                                                                                                                                                                                                                                                                                                                                                                                                                                                                                                                                                                                                                                                                                                                                                                               | S18 |
| <b>Figure S26.</b> HPLC chromatogram of <b>19a</b> under the following analytical condition: system: Agilent 1260 HPLC system; column: Agilent Eclipse ZORBAX XDB-C18 (46×250 mm; 5 μm); flowrate: 1.0 mL/min; column temperature: 40°C; UV wavelength: 272 nm; solvent system: 0-10 min: 100% MeOH. ....                                                                                                                                                                                                                                                                                                                                                                                                                                                                                                                                                                                                        | S18 |
| <b>Figure S27.</b> <sup>1</sup> H-NMR spectrum of <b>19b</b> .....                                                                                                                                                                                                                                                                                                                                                                                                                                                                                                                                                                                                                                                                                                                                                                                                                                               | S19 |
| <b>Figure S28.</b> A: Brine shrimps ( <i>Artemia salina</i> ) were used for the investigation of cytotoxic activity. The naupliis are considered dead when there is no movement for 30 seconds. All the tests were replicated three times. (Copyright of super macro close up of <i>A. salina</i> was purchased from Depositphotos Inc. United States, <a href="https://depositphotos.com/377593032/stock-photo-super-macro-close-artemia-salina.html">https://depositphotos.com/377593032/stock-photo-super-macro-close-artemia-salina.html</a> ). B: Cytotoxic potential of compounds and standard drugs against <i>Artemia salina</i> . The percentage of deaths of shrimps is shown in the gray column. Probit values are shown in the blue line. The ZIKV inhibitor (berberine derivative- <b>4d</b> ) was described by us previously published and it was used as standard (DOI:10.1155/2021/5567111)..... | S22 |
| <b>Figure S29.</b> Redocking (blue) and co-crystallized benzimidazole-1-ylmethanol (violet) in the NS2B-NS3 binding site suggested. RMSD value of 0.5936 for backbone chain using Maestro.....                                                                                                                                                                                                                                                                                                                                                                                                                                                                                                                                                                                                                                                                                                                   | S23 |
| <b>Figure S30.</b> Interaction and distance of compounds <b>9 b</b> and <b>17b</b> with amino acids in the NS2B-NS3 binding site.....                                                                                                                                                                                                                                                                                                                                                                                                                                                                                                                                                                                                                                                                                                                                                                            | S23 |

**Figure S1-S27: Spectral data (<sup>1</sup>H-NMR, HRMS spectrum, and HPLC/GC-FID) of synthesized compounds**

**7a**

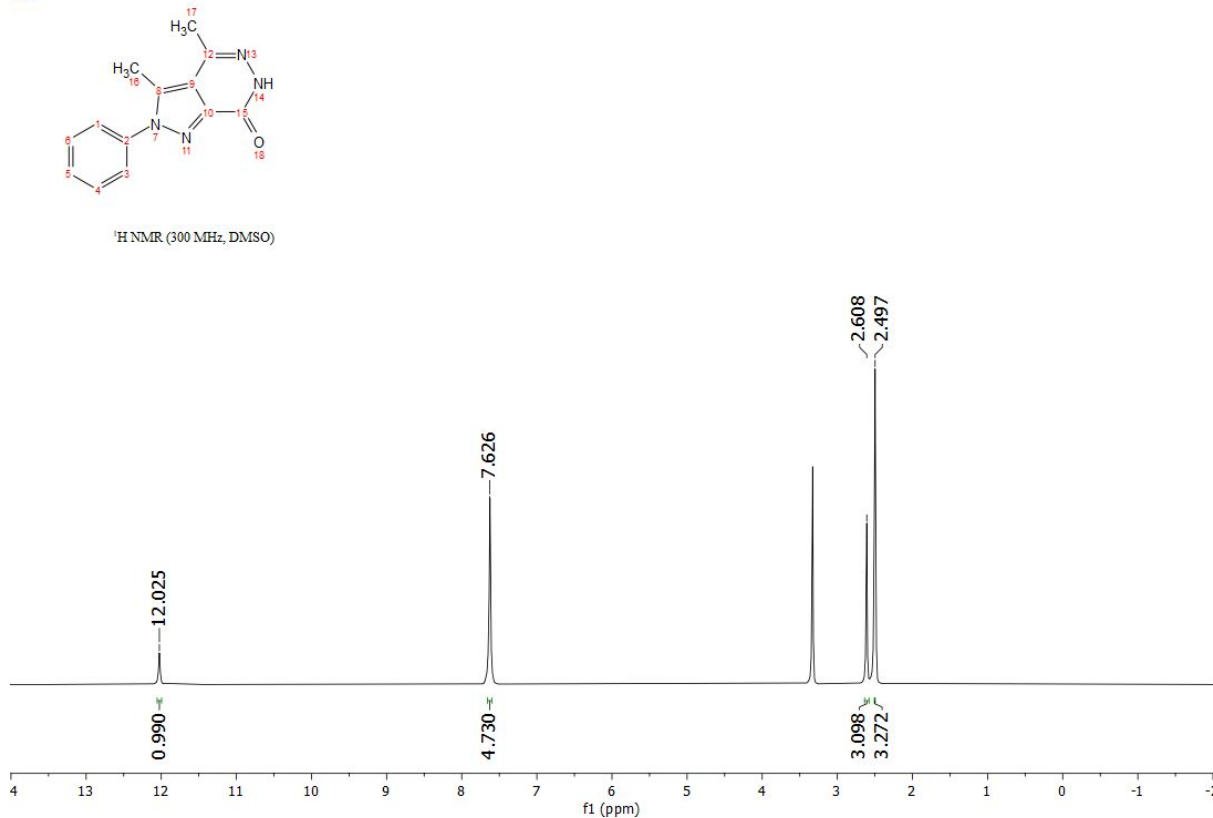

**Figure S1. <sup>1</sup>H-NMR spectrum of 7a**

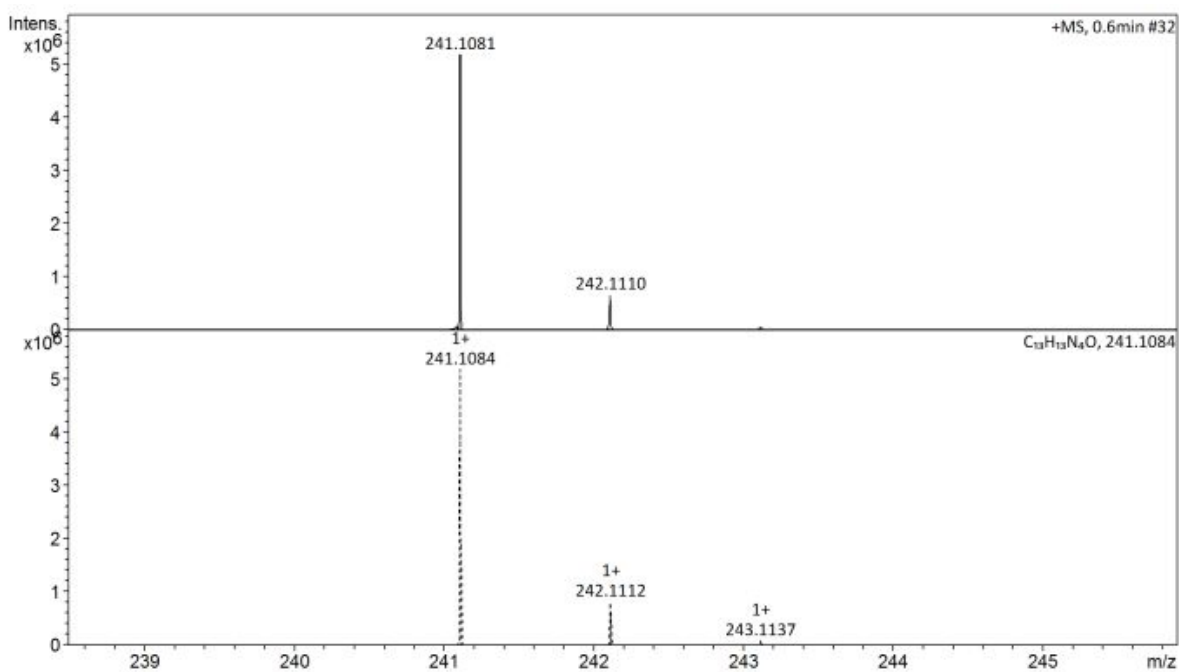

**Figure S2. HRMS spectrum of 7a**

7b

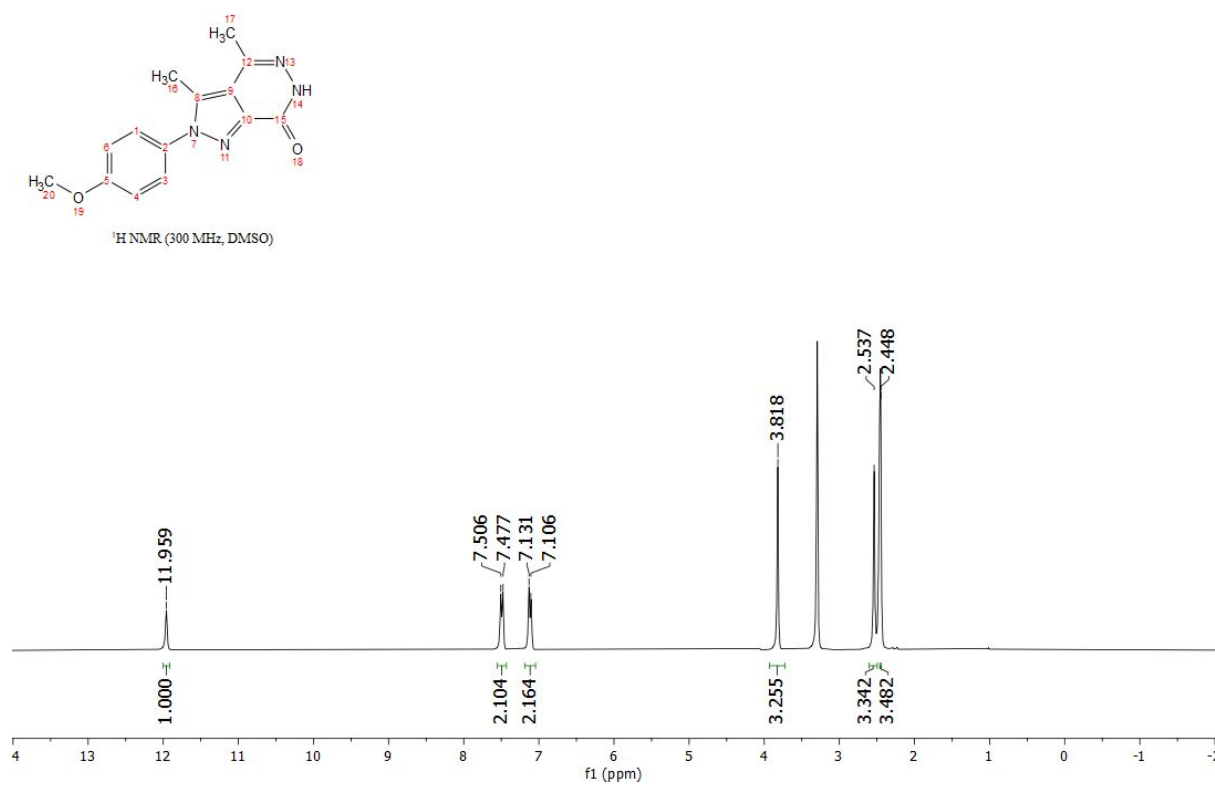

Figure S3. <sup>1</sup>H-NMR spectrum of 7b

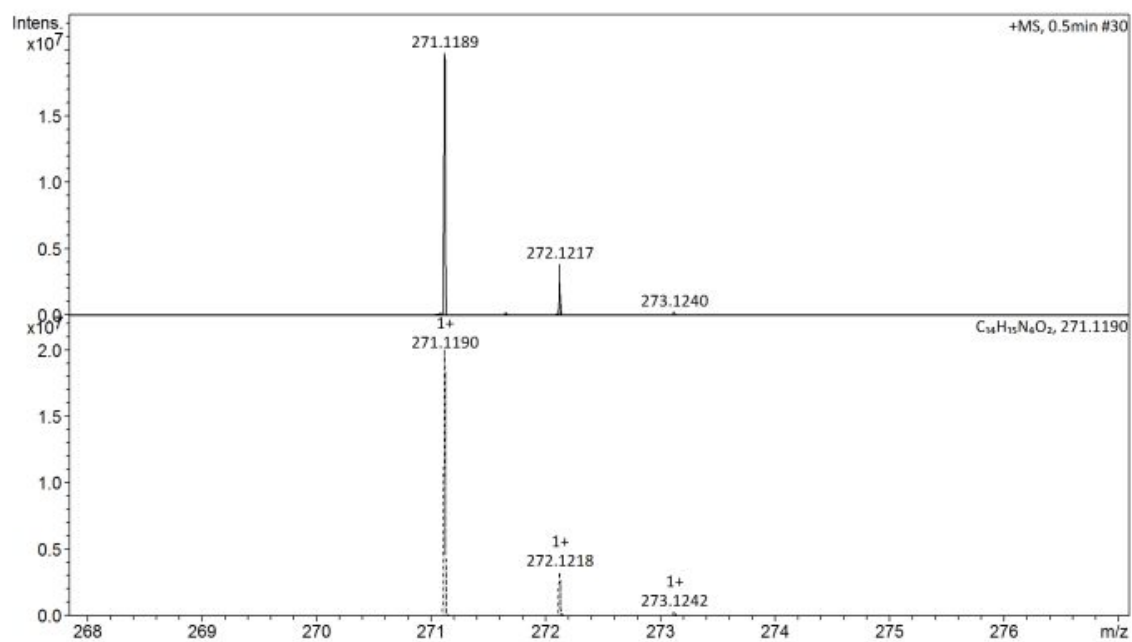

Figure S4. HRMS spectrum of 7b

9a

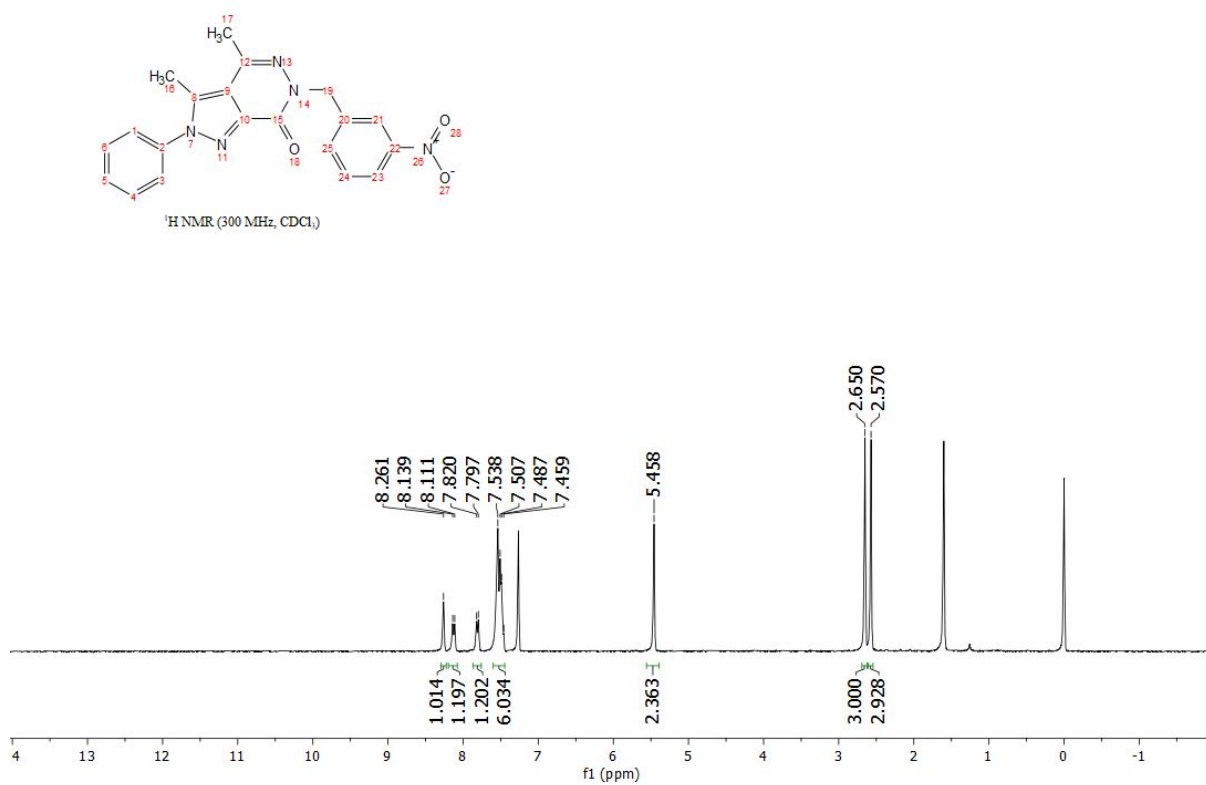

Figure S5. <sup>1</sup>H-NMR spectrum of 9a

9b

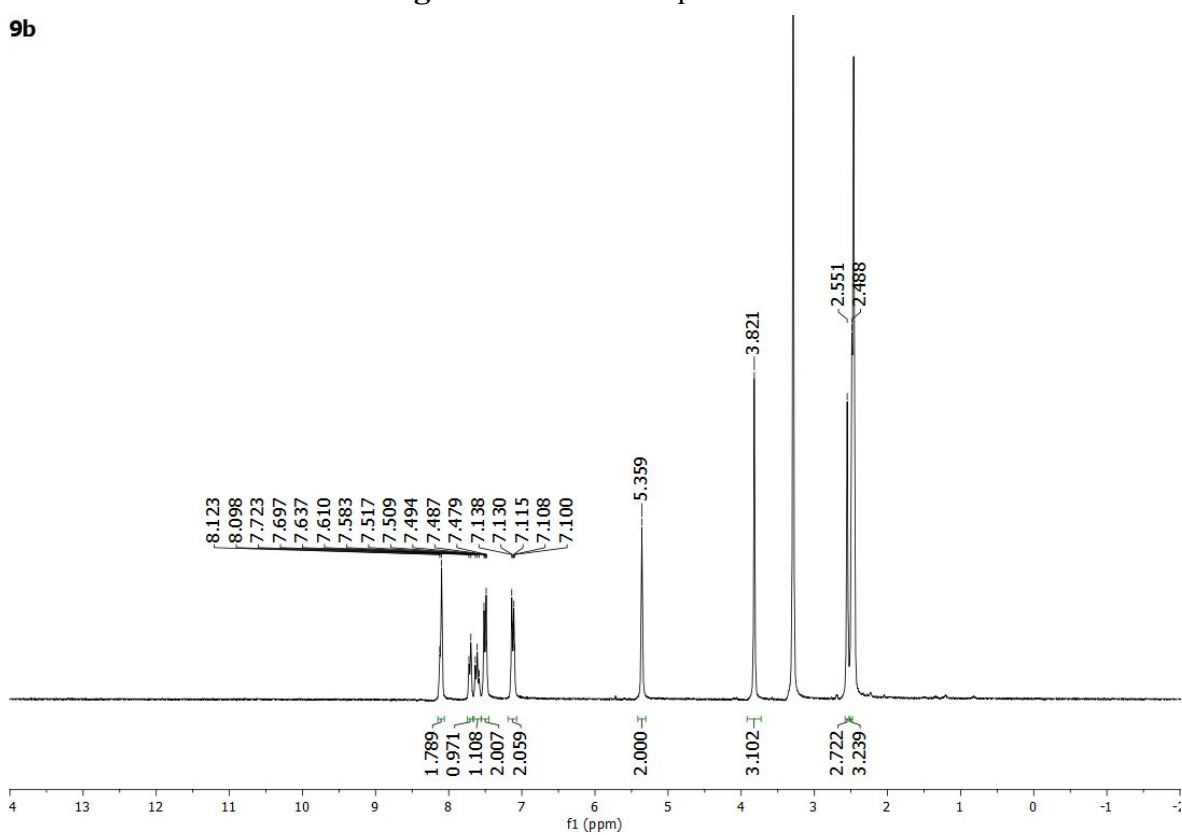

Figure S6. <sup>1</sup>H-NMR spectrum of 9b

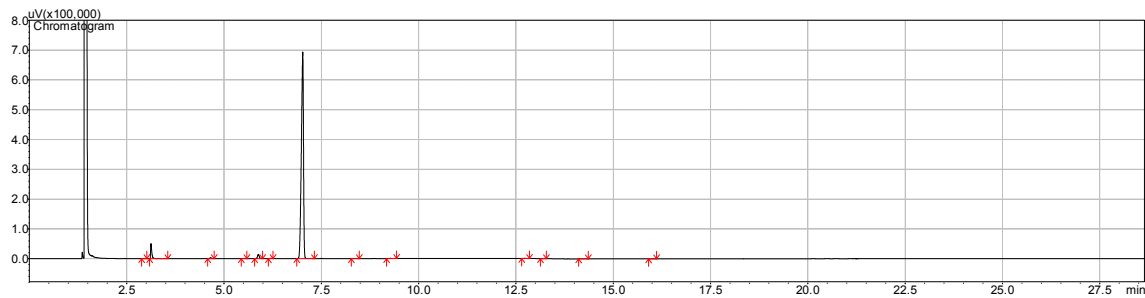

**Figure S7.** GC chromatogram of **9b**. GC-FID 2010 model (Shimadzu) in the following conditions: Programmed Temperature Vaporizer (PTV) in direct inject mode at 250°C using hydrogen as carrier gas and column flow in 2.04 mL/min at a constant pressure mode. The column oven temperature program started 150°C (hold 1 min), then programmed at 10°C/min to 320 °C (hold 4 min). The total analytical time was 30 min. The detector temperature was 320°C.

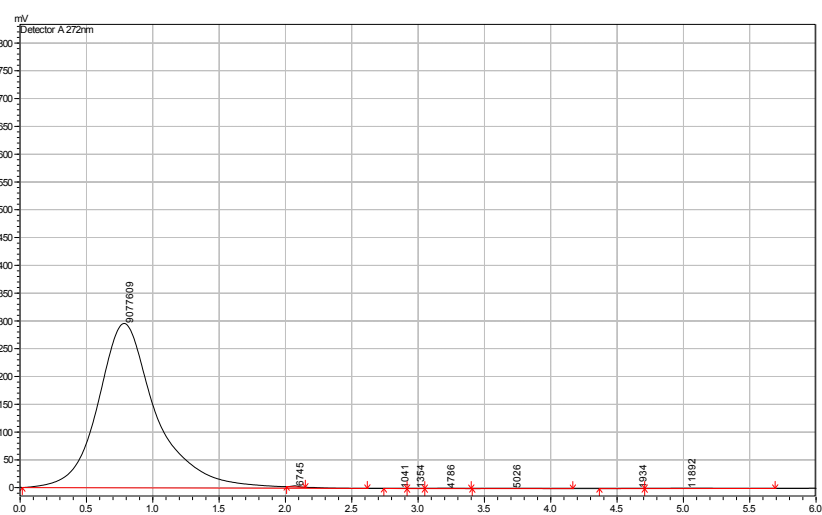

**Figure S8.** HPLC chromatogram of **9b** under the following analytical condition: system: Agilent 1260 HPLC system; column: Agilent Eclipse ZORBAX XDB-C18 (46×250 mm; 5 µm); flowrate: 1.0 mL/min; column temperature: 40°C; UV wavelength: 272 nm; solvent system: 0-10 min: 100% MeOH.

10a

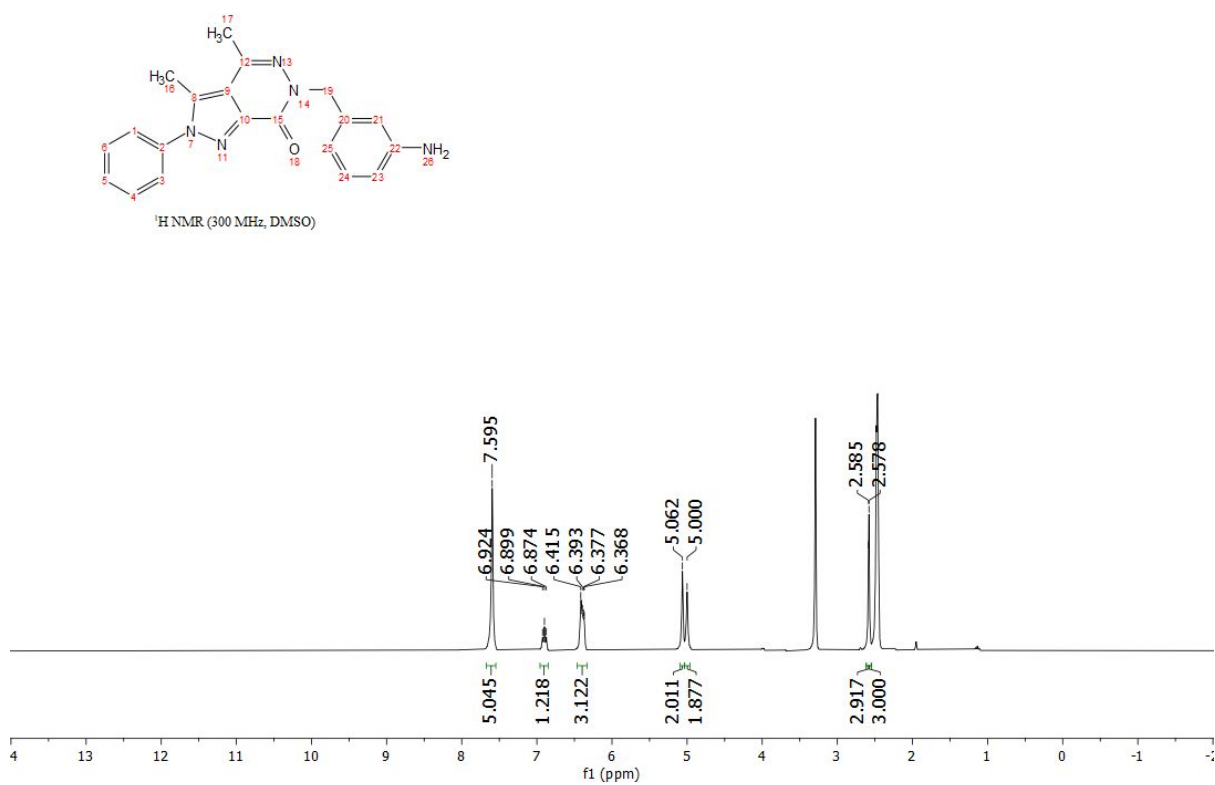

Figure S9. <sup>1</sup>H-NMR spectrum of 10a



10b

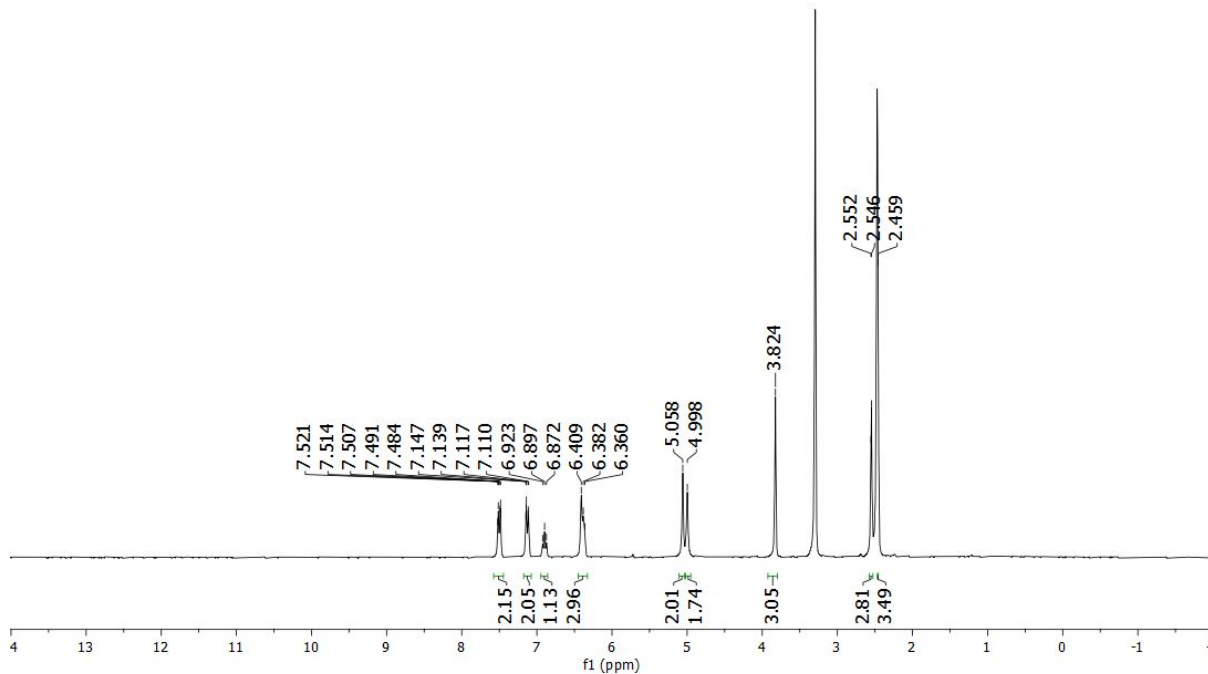

Figure S10. <sup>1</sup>H-NMR spectrum of 10b

<Chromatogram>

mV

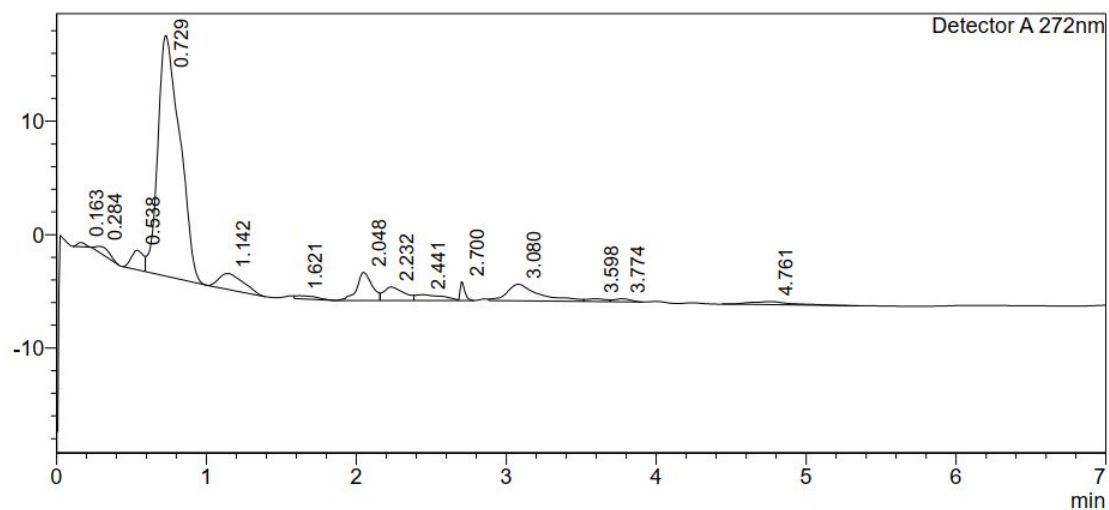

Figure S11. HPLC chromatogram of 10b under the following analytical condition: system: Agilent 1260 HPLC system; column: Agilent Eclipse ZORBAX XDB-C18 (46×250 mm; 5 μm); flowrate: 1.0 mL/min; column temperature: 40°C; UV wavelength: 272 nm; solvent system: 0-10 min: 100% MeOH.

11

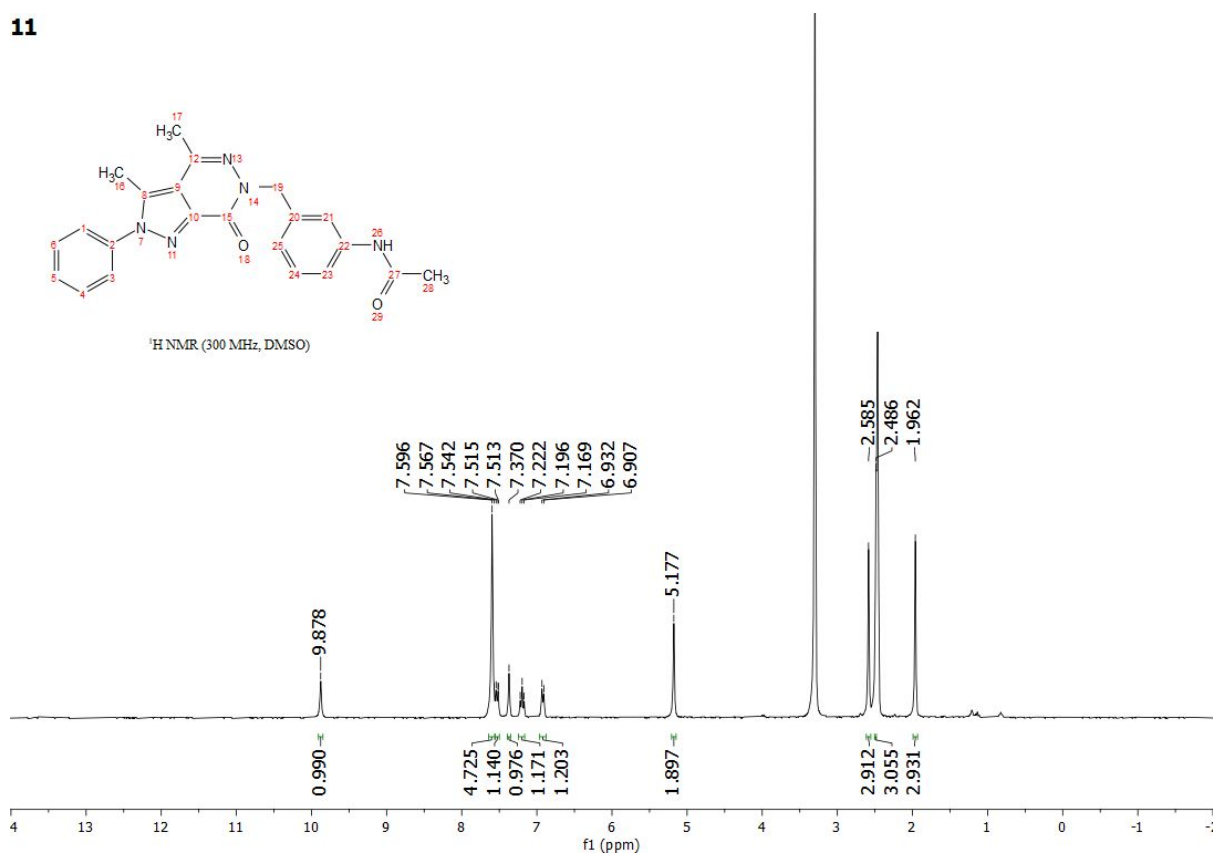

Figure S12. <sup>1</sup>H-NMR spectrum of 11

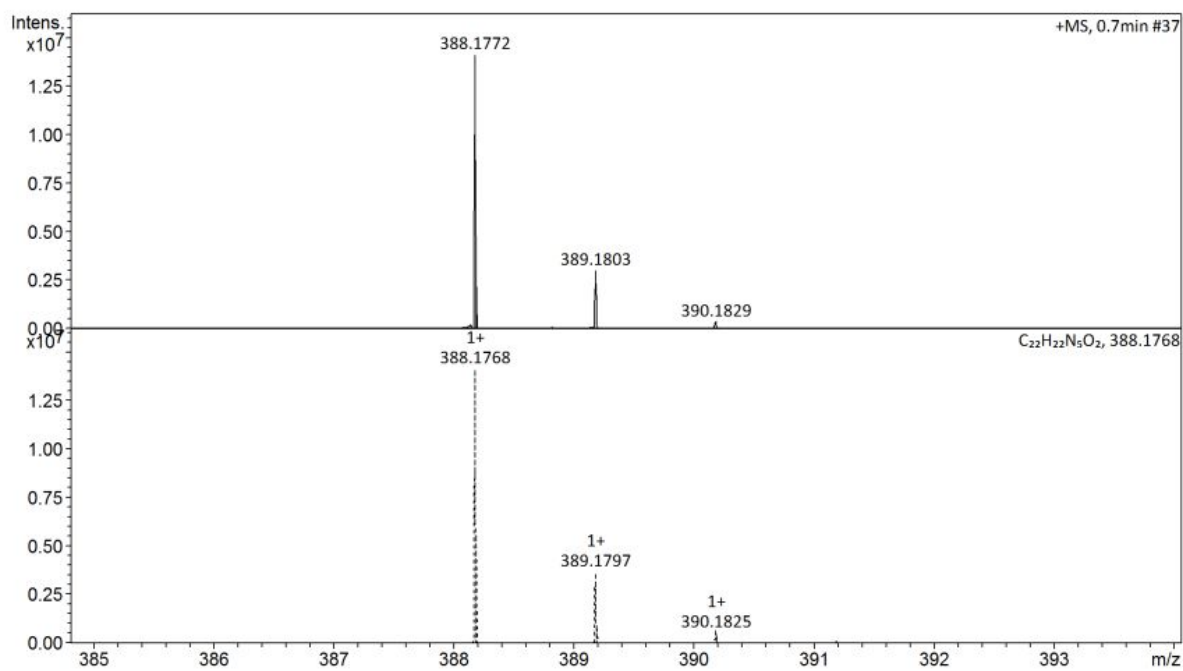

Figure S13. HRMS spectrum of 11

12

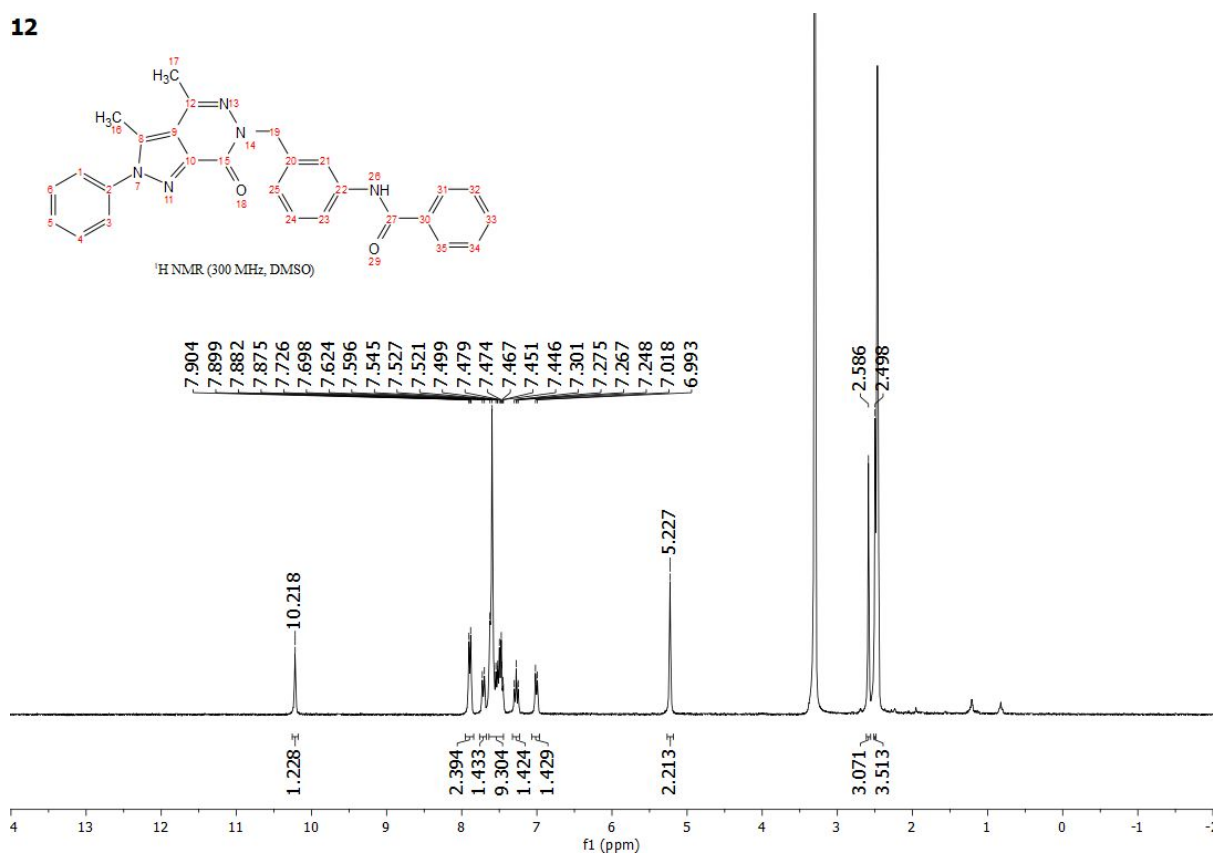

Figure S14. <sup>1</sup>H-NMR spectrum of 12

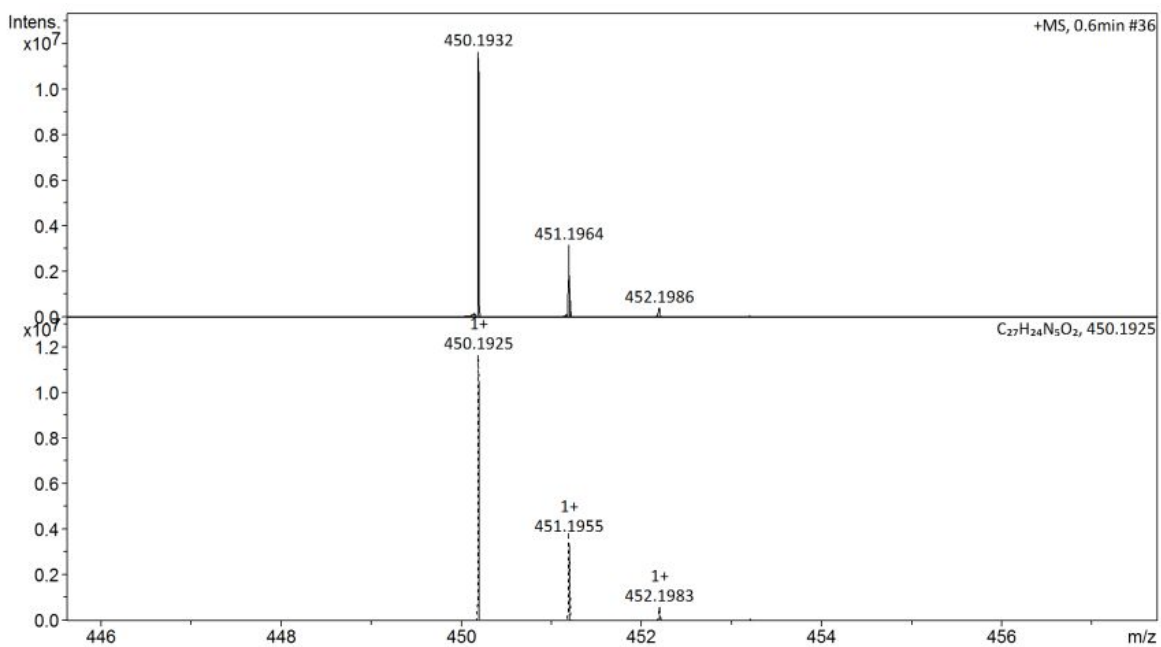

Figure S15. HRMS spectrum of 12

13

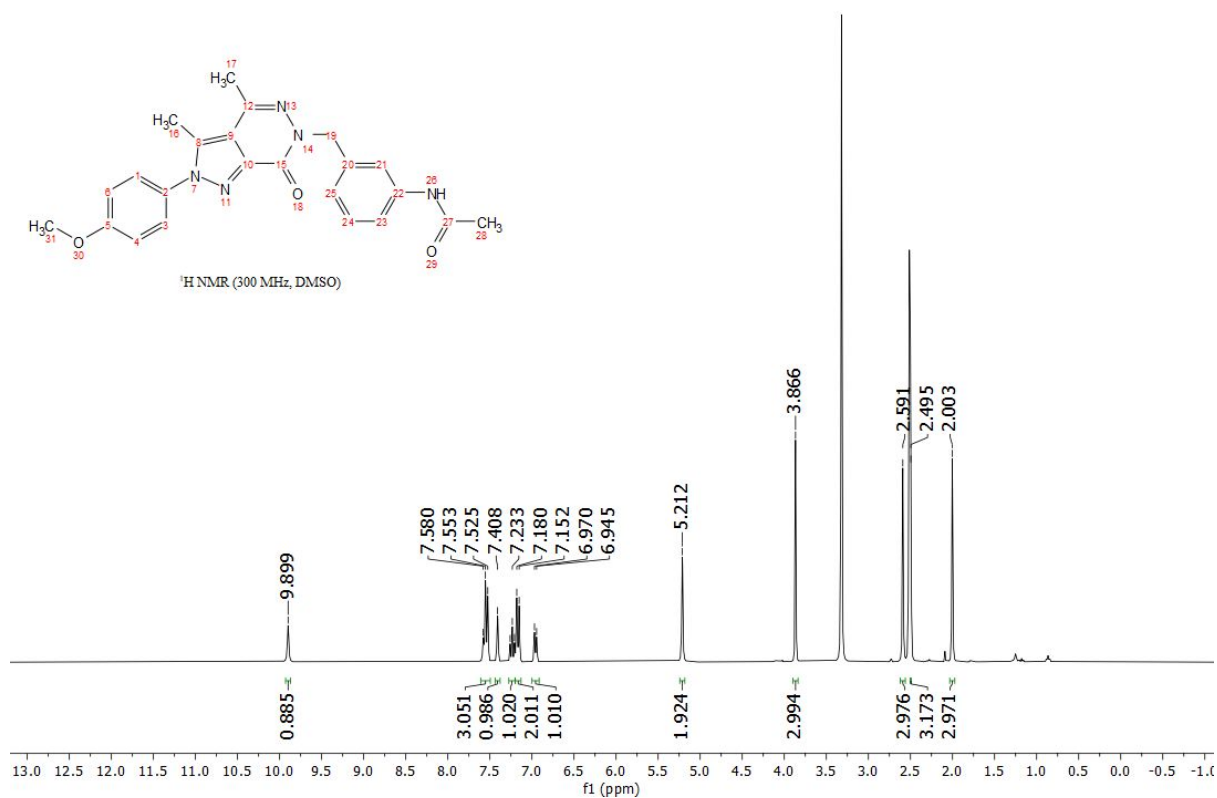

Figure S16. <sup>1</sup>H-NMR spectrum of 13

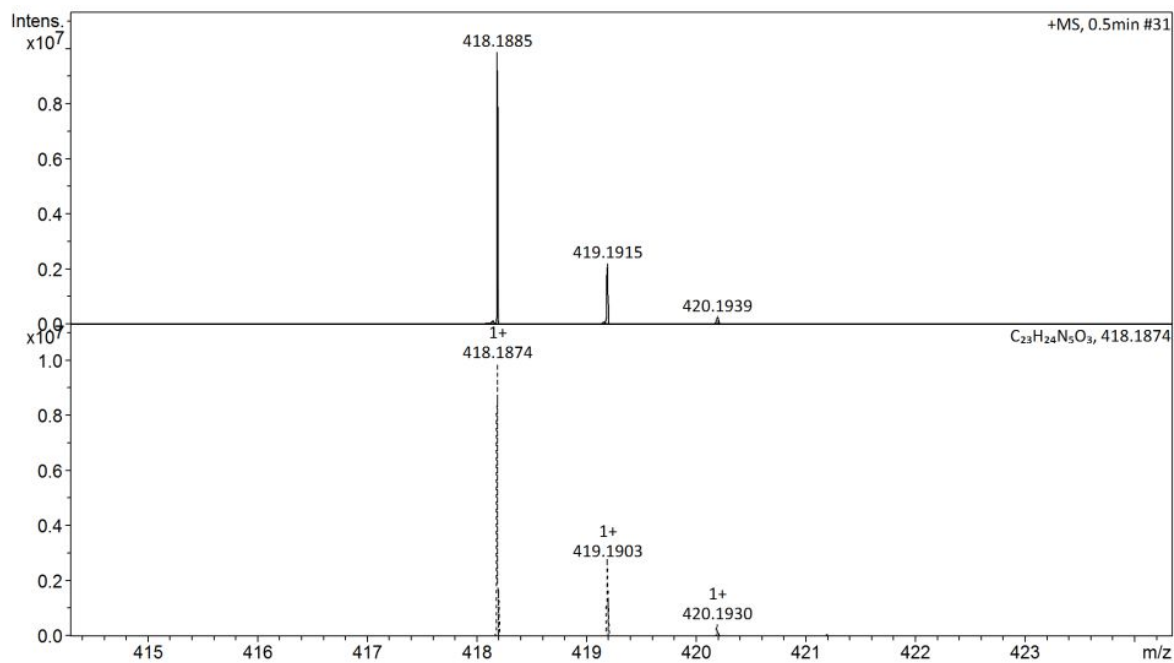

Figure S17. HRMS spectrum of 13

14

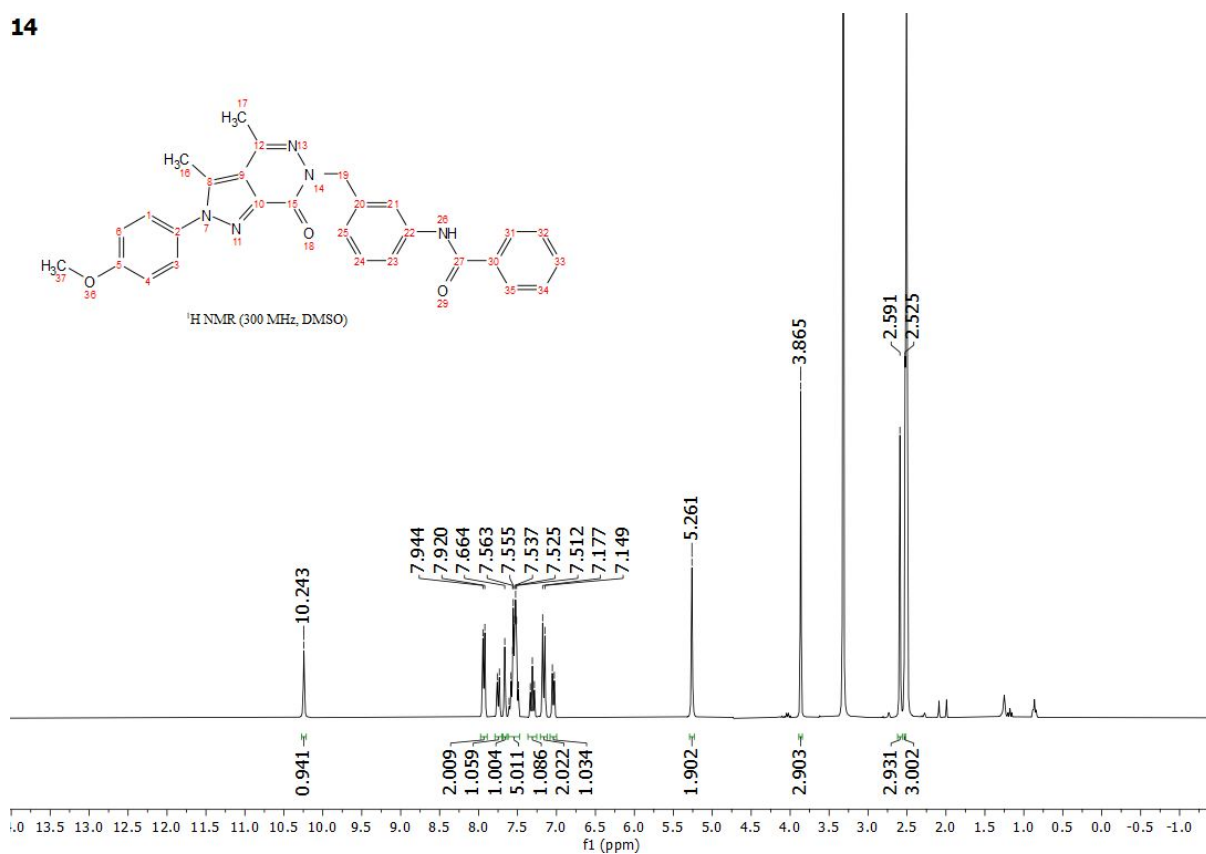

Figure S18. <sup>1</sup>H-NMR spectrum of 14

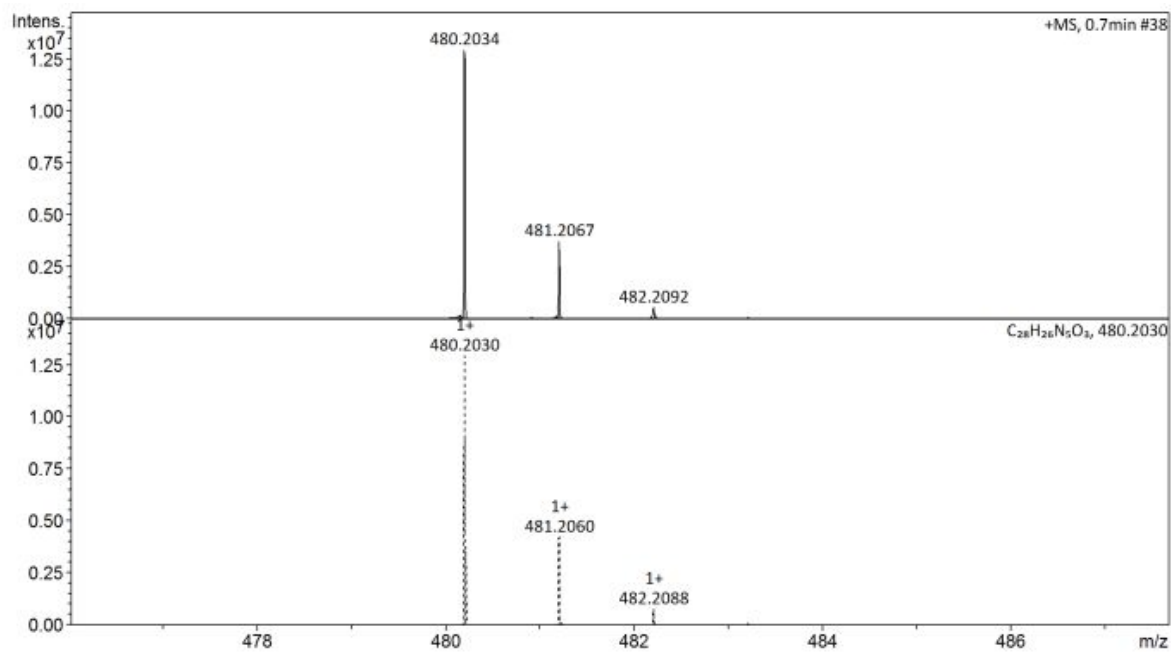

Figure S19. HRMS spectrum of 14

17a

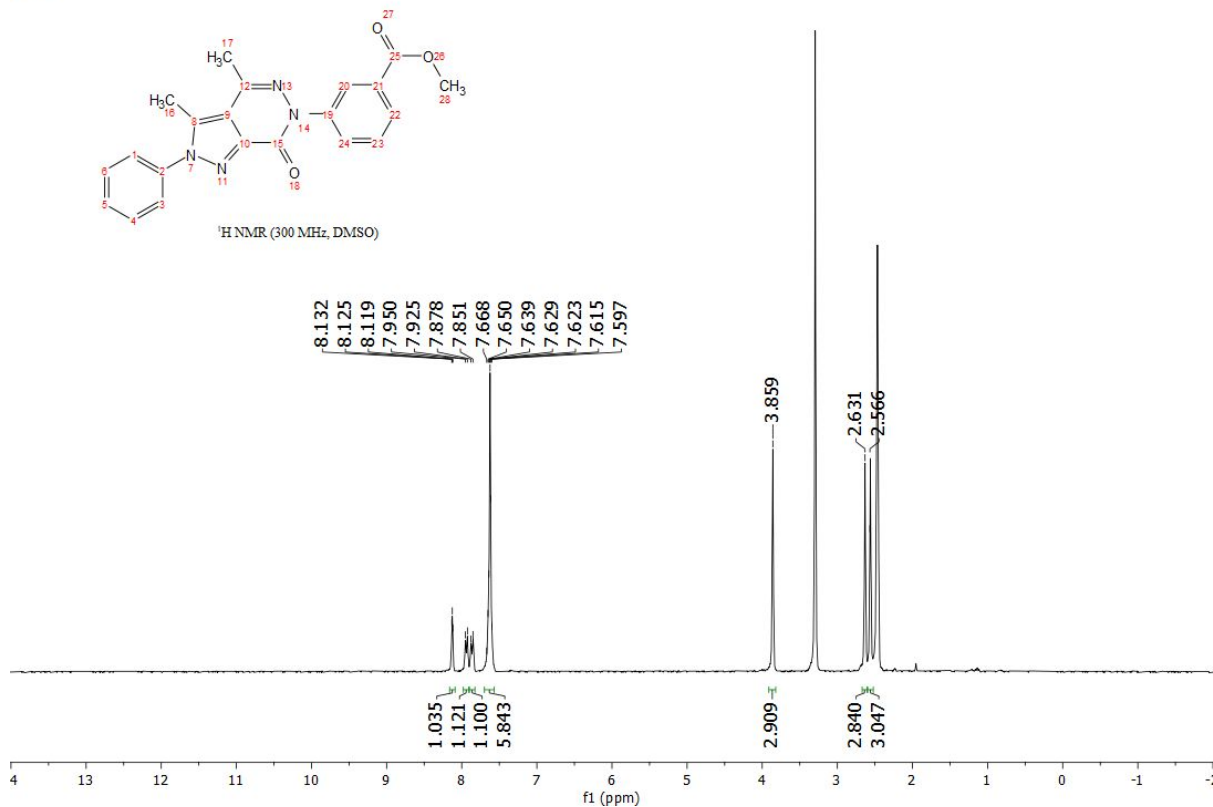

Figure S20. <sup>1</sup>H-NMR spectrum of 17a

<Chromatogram>

mV

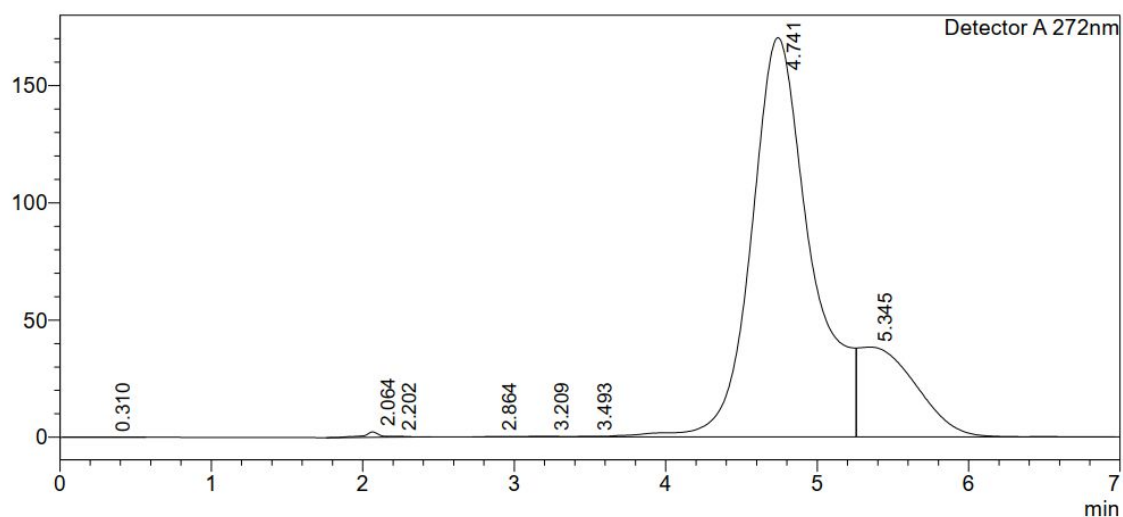

Figure S21. HPLC chromatogram of 17a under the following analytical condition: system: Agilent 1260 HPLC system; column: Agilent Eclipse ZORBAX XDB-C18 (46×250 mm; 5 μm); flowrate: 1.0 mL/min; column temperature: 40°C; UV wavelength: 272 nm; solvent system: 0-10 min: 100% MeOH.

17b

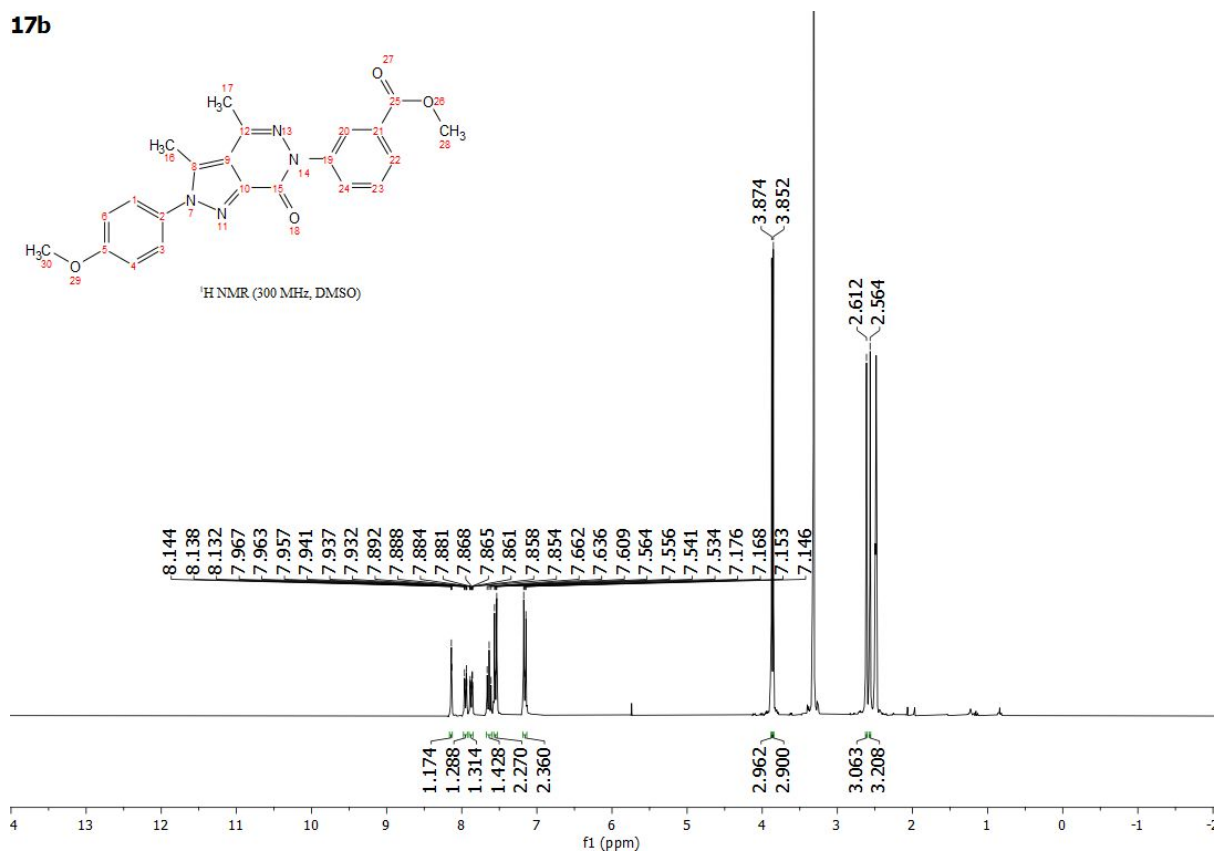

Figure S22. <sup>1</sup>H-NMR spectrum of 17b

18a

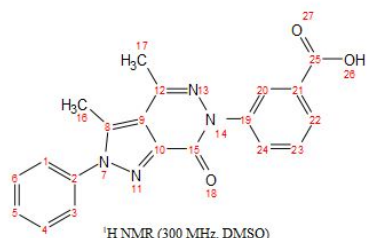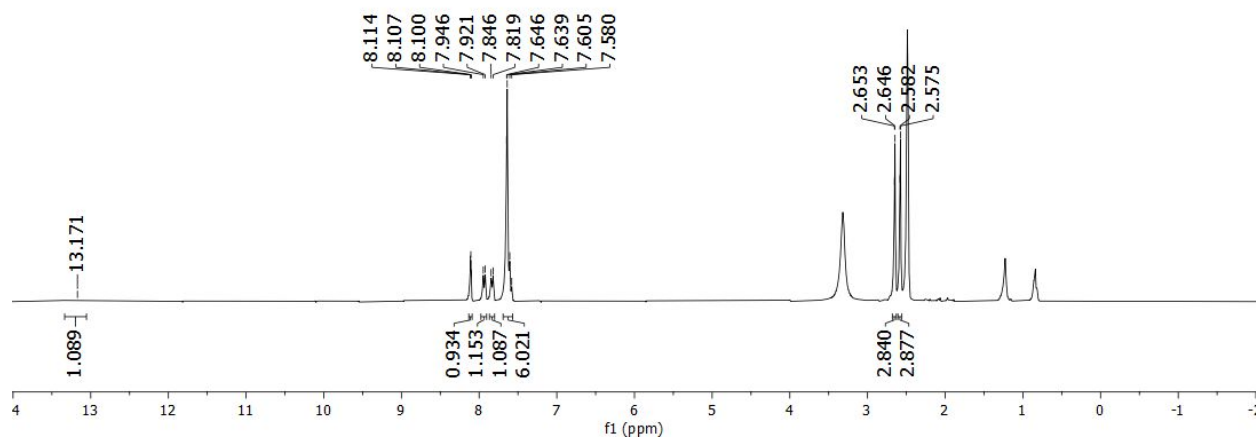

Figure S23. <sup>1</sup>H-NMR spectrum of 18a



**18b**

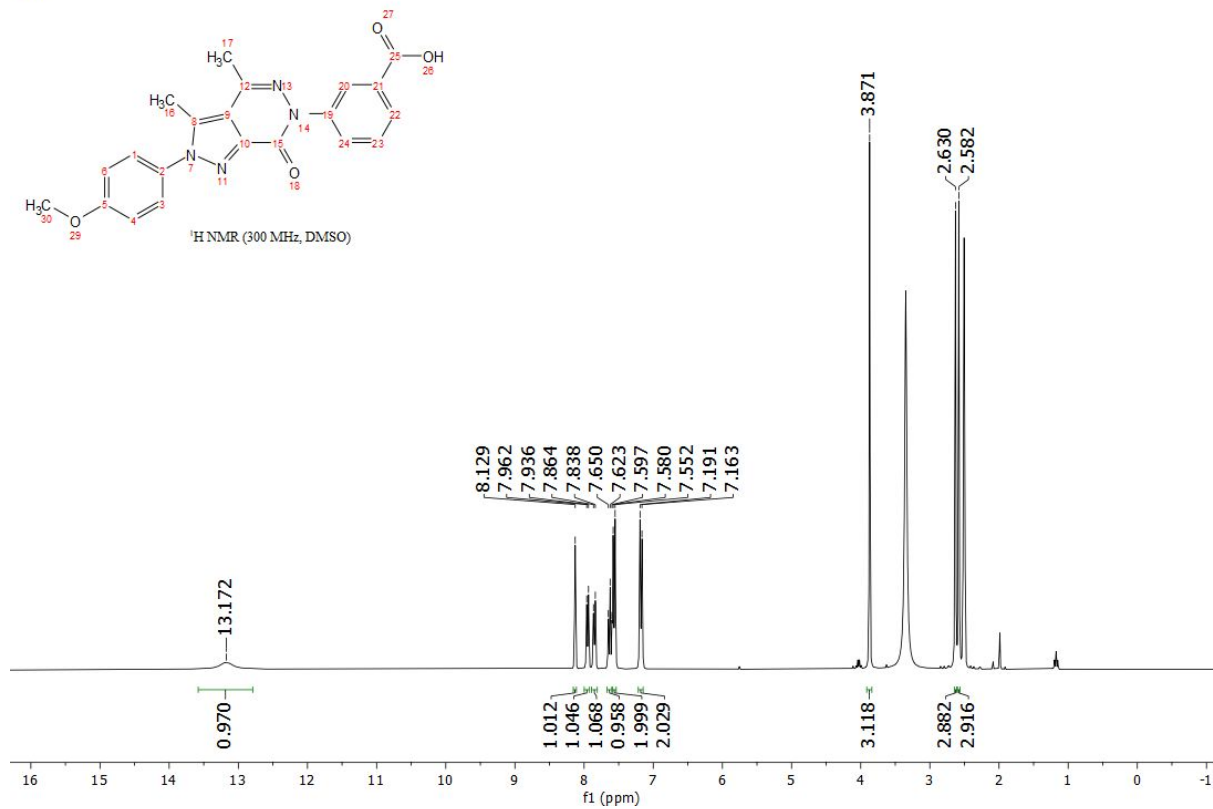

**Figure S24.** <sup>1</sup>H-NMR spectrum of **18b**

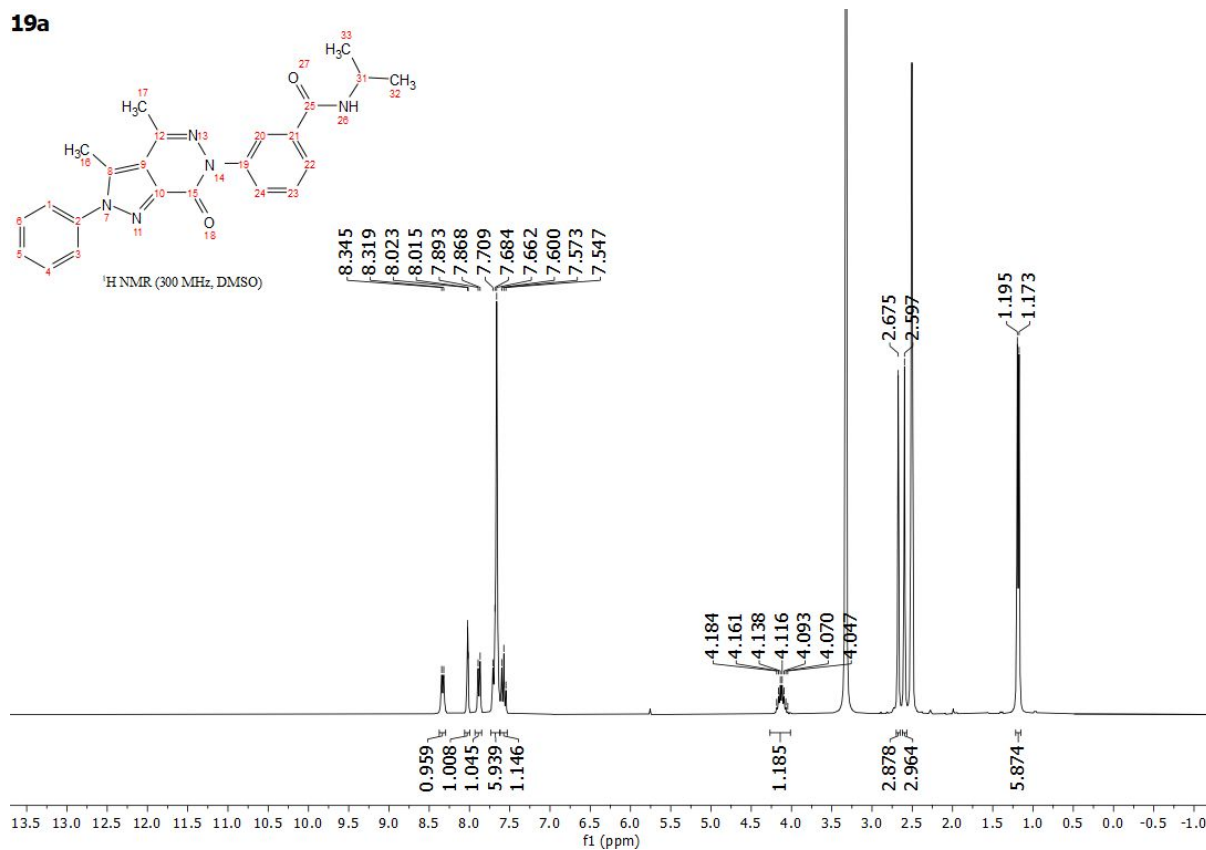

**Figure S25.** <sup>1</sup>H-NMR spectrum of **19a**

<Chromatogram>

mV

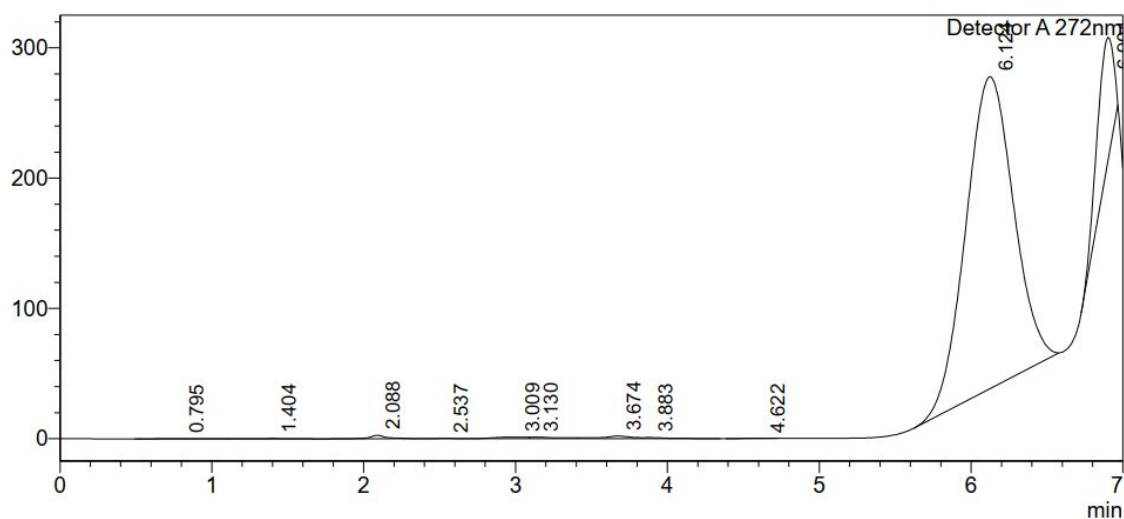

**Figure S26.** HPLC chromatogram of **19a** under the following analytical condition: system: Agilent 1260 HPLC system; column: Agilent Eclipse ZORBAX XDB-C18 (46×250 mm; 5 μm); flowrate: 1.0 mL/min; column temperature: 40°C; UV wavelength: 272 nm; solvent system: 0-10 min: 100% MeOH.

19b

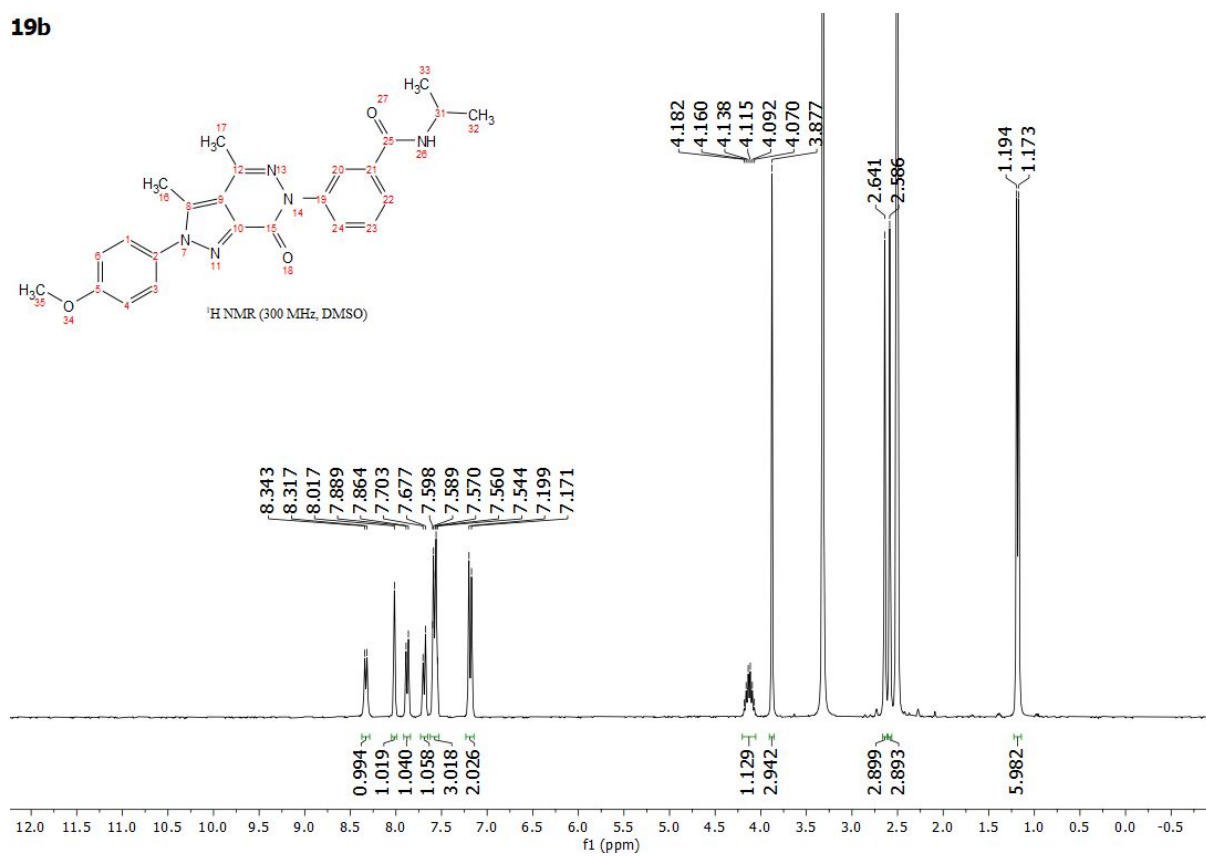

Figure S27. <sup>1</sup>H-NMR spectrum of 19b

Biological assay for all compounds (Table S1 and Figure S28)

Table S1. Dose-response curves of compounds against the ZIKV

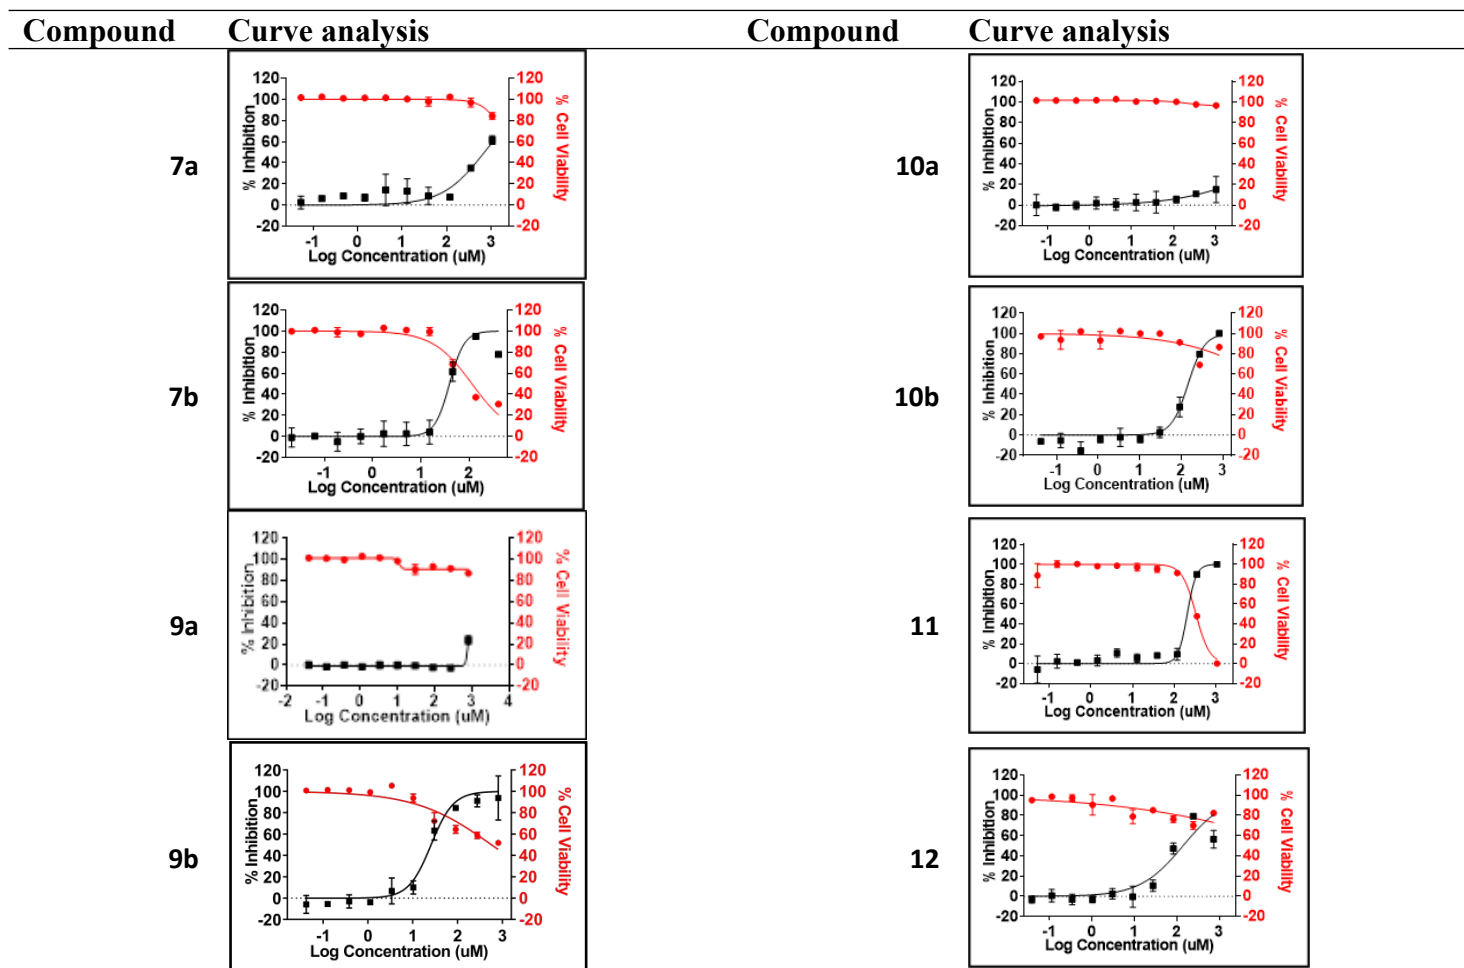

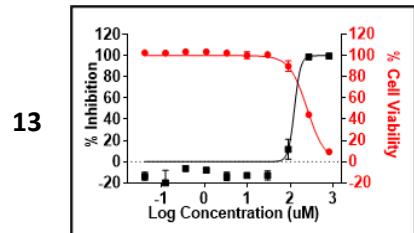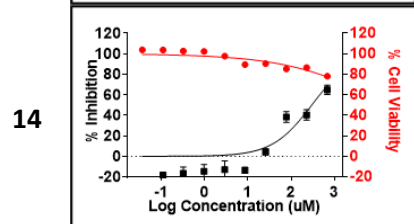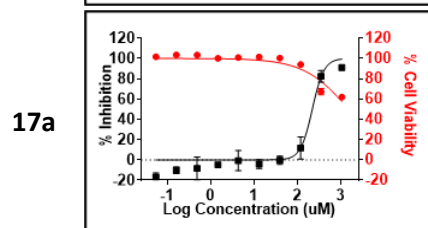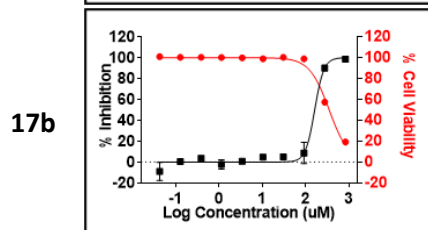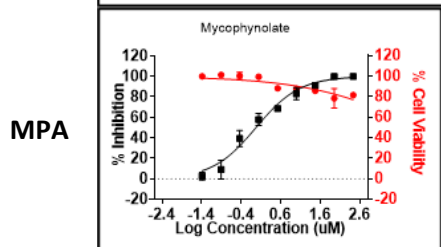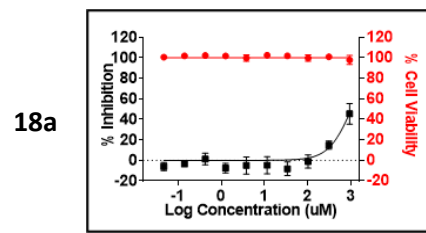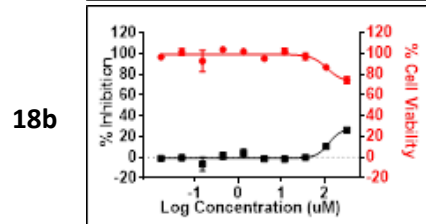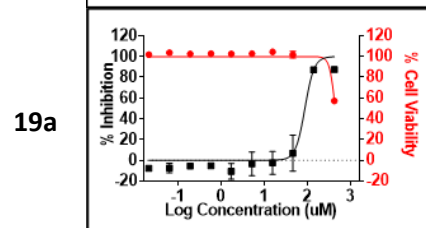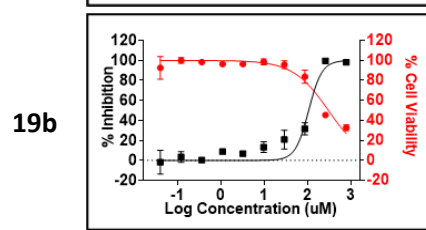

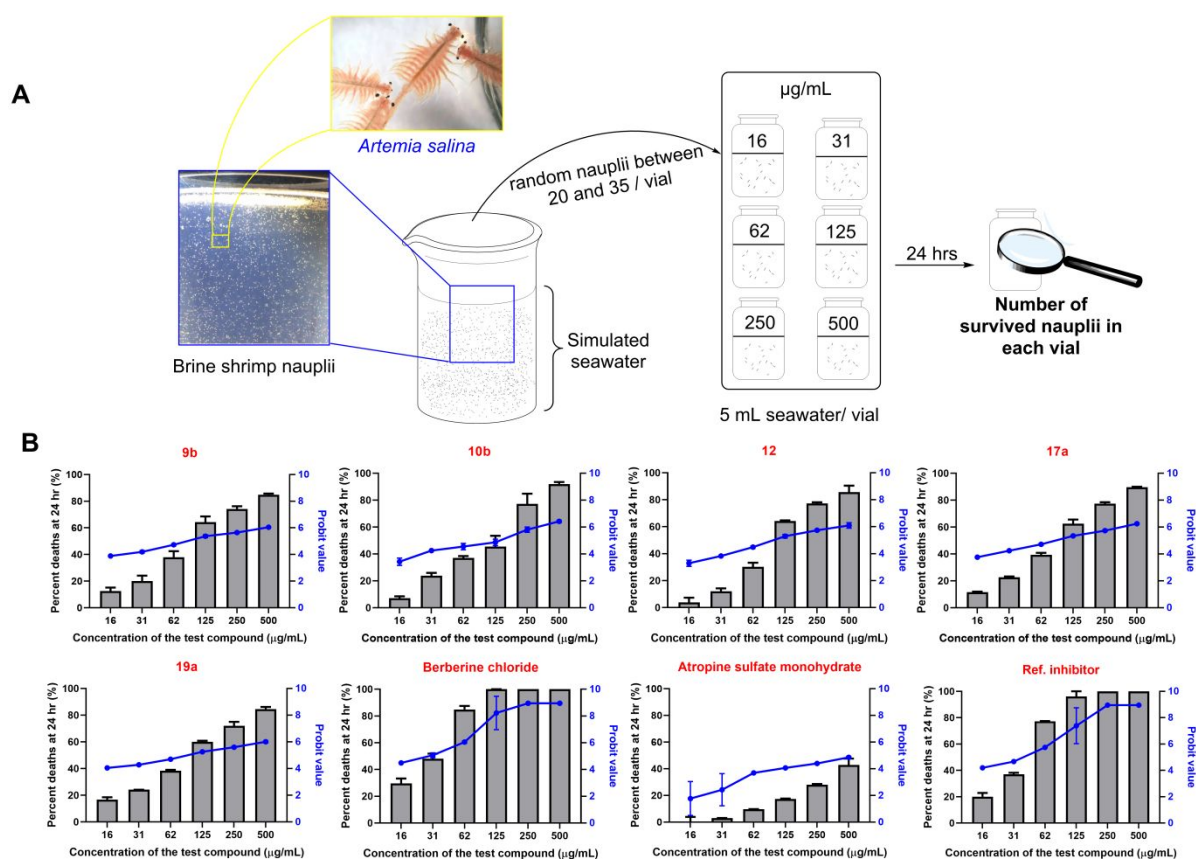

**Figure S28.** A: Brine shrimps (*Artemia salina*) were used for the investigation of cytotoxic activity. The naupliis are considered dead when there is no movement for 30 seconds. All the tests were replicated three times. (Copyright of super macro close up of *A. salina* was purchased from Depositphotos Inc. United States, <https://depositphotos.com/377593032/stock-photo-super-macro-close-artemia-salina.html>). B: Cytotoxic potential of compounds and standard drugs against *Artemia salina*. The percentage of deaths of shrimps is shown in the gray column. Probit values are shown in the blue line. The ZIKV inhibitor (berberine derivative-**4d**) was described by us previously published and it was used as standard (DOI:10.1155/2021/5567111)

## Molecular docking and pharmacophore model (Figure S29-S30 Table S2)

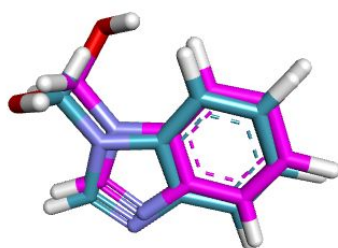

**Figure S29.** Redocking (blue) and co-crystallized benzimidazole-1-ylmethanol (violet) in the NS2B-NS3 binding site suggested. RMSD value of 0.5936 for backbone chain using Maestro

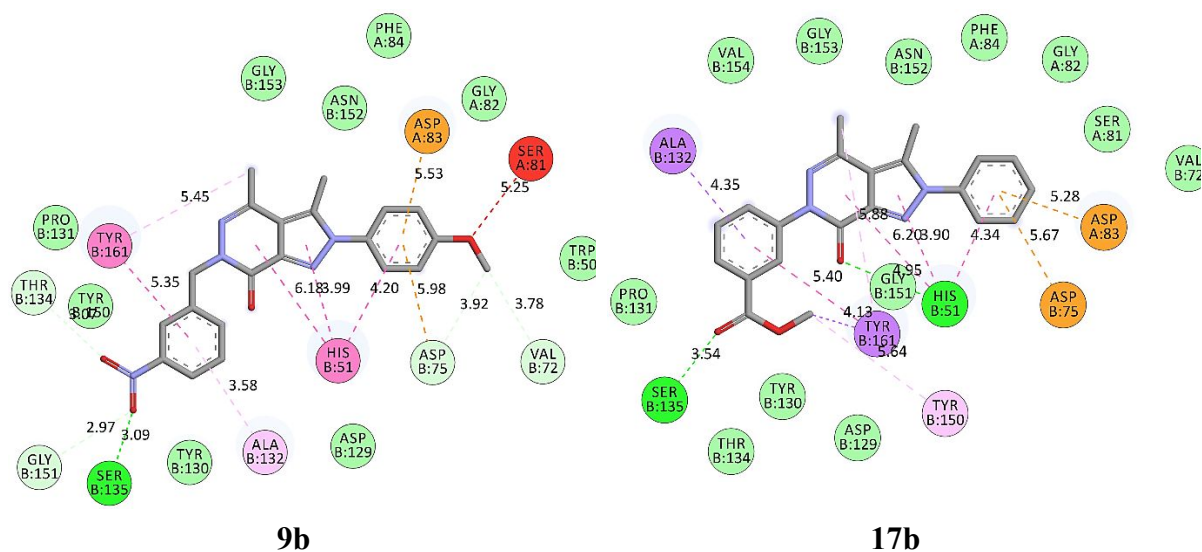

### Interaction

|                                                                                     |                               |                                                                                     |                |                                                                                       |               |
|-------------------------------------------------------------------------------------|-------------------------------|-------------------------------------------------------------------------------------|----------------|---------------------------------------------------------------------------------------|---------------|
|  | Conventional Hydrogen Bond    |  | Pi-Anion       |  | Van der Waals |
|  | Carbon Hydrogen Bond          |  | Pi-Pi Stacked  |  | Pi-Alkyl      |
|  | Unfavorable Acceptor-Acceptor |  | Pi-Pi T-shaped |  | Pi-sigma      |

**Figure S30.** Interaction and distance of compounds **9 b** and **17b** with amino acids in the NS2B-NS3 binding site.

**Table S2.** Top ten molecules from virtual screening protocol

| Top | ChemDiv database                                                                                 | RMSD  | ZINC database                                                                                         | RMSD  |
|-----|--------------------------------------------------------------------------------------------------|-------|-------------------------------------------------------------------------------------------------------|-------|
|     | Molecules                                                                                        |       | Molecules                                                                                             |       |
| 1   | 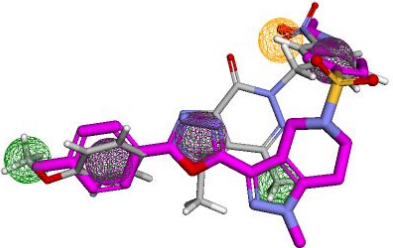<br>L856-0019   | 0.438 | <br>ZINC1064562     | 0.430 |
| 2   | <br>M177-0899   | 0.449 | <br>ZINC874077      | 0.434 |
| 3   | <br>M177-0896 | 0.468 | <br>ZINC33412328   | 0.436 |
| 4   | <br>M034-2432 | 0.494 | <br>ZINC1360047   | 0.440 |
| 5   | <br>6466-0245 | 0.505 | <br>ZINC520429136 | 0.441 |



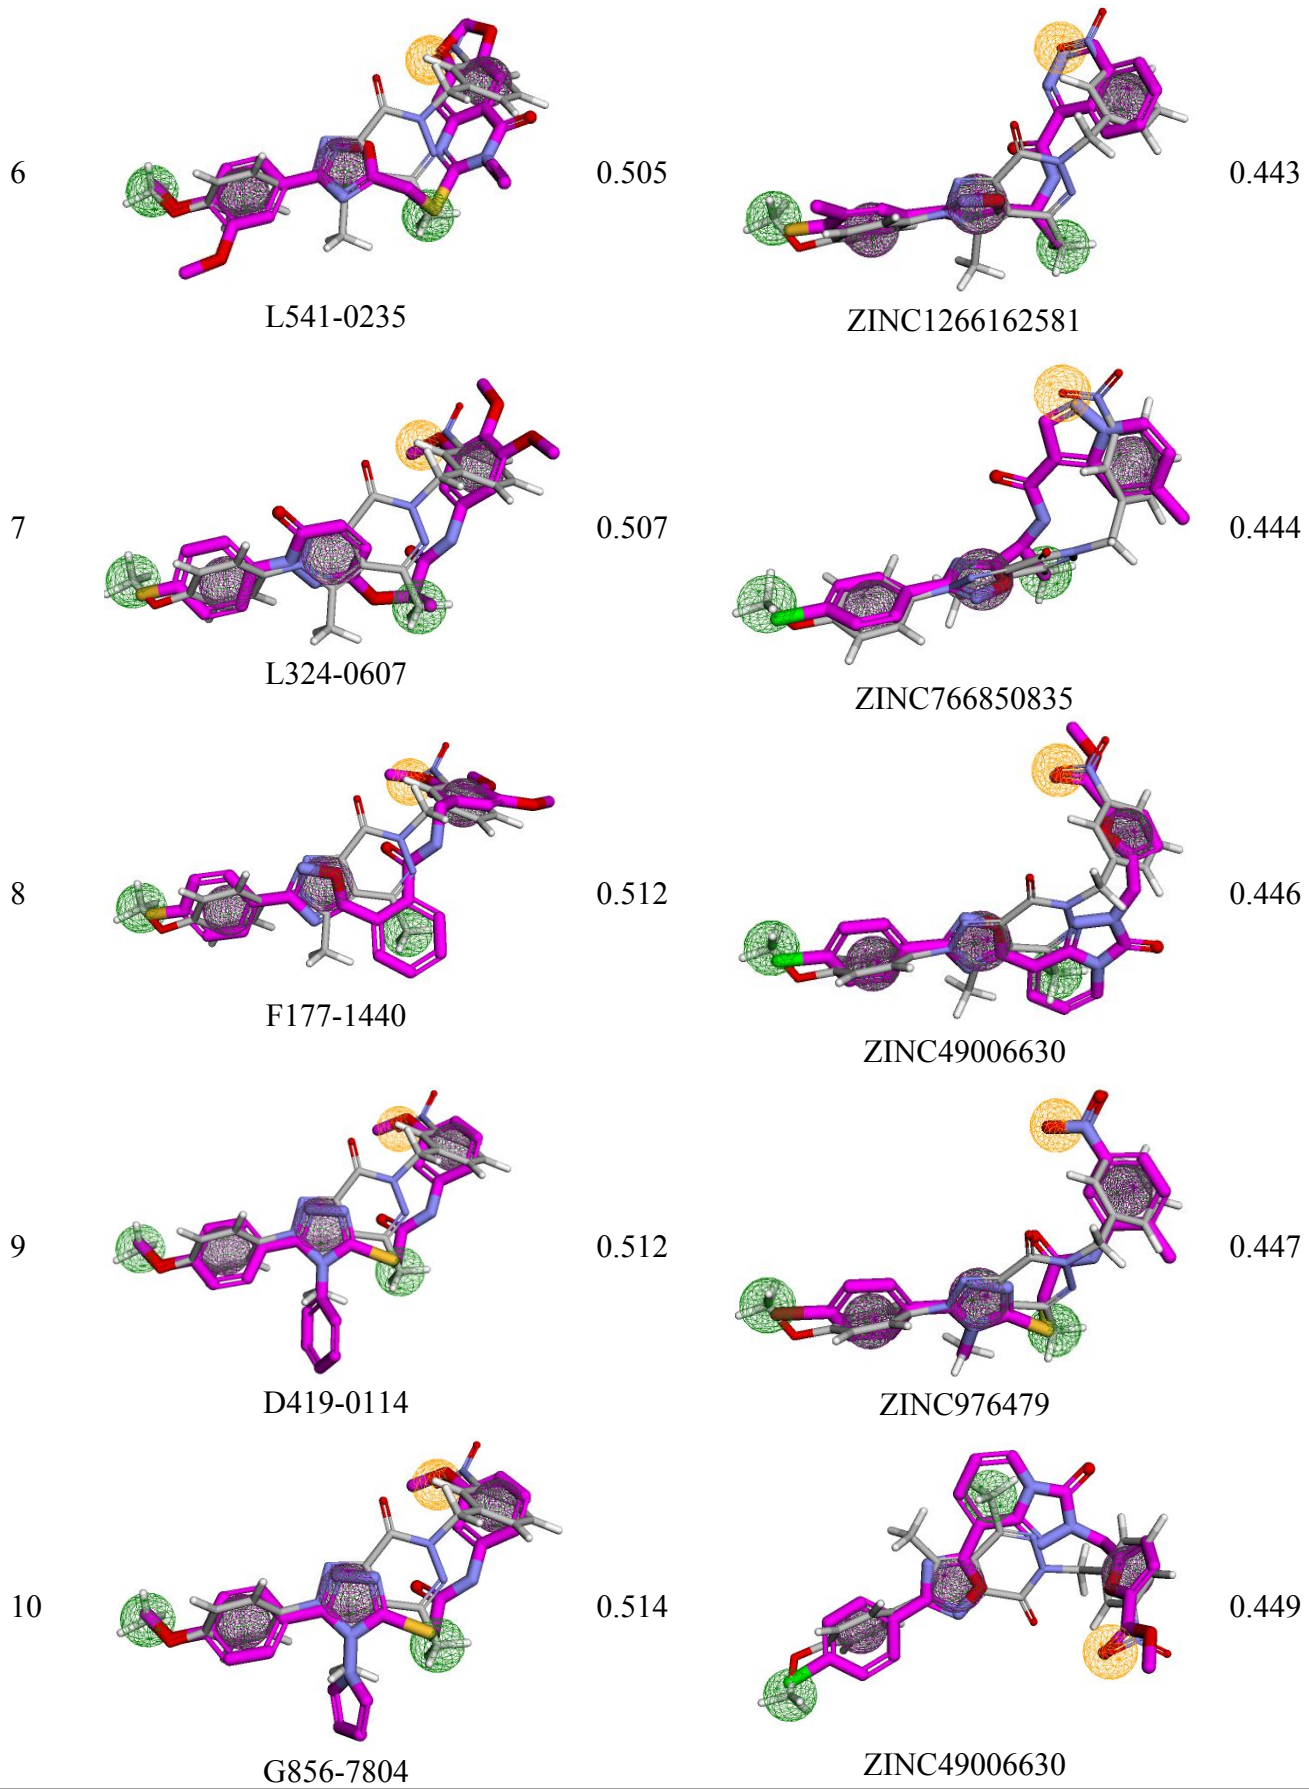

Supplement: ao3c06612_si_001.pdf [file ao3c06612_si_001.pdf]
